# Supplementary material for: Stratification of eosinophilic asthma patients treated with reslizumab and GINA Step 4 or 5 therapy
Source: PubMed Central journal article supplement — ERJ Open Res. 2017 Aug 17;3(3):00004-2017. doi: 10.1183/23120541.00004-2017 (PMC5570512; doi:10.1183/23120541.00004-2017), 2017-08-17
Supplement: 00004-2017_supp.pdf [file 00004-2017_supp.pdf]

## Supplementary material

**TABLE S1** Analyses of ACQ-7 scores with reslizumab by GINA Step 4 baseline therapy

| Assessment | Reduction in ACQ-7 scores with reslizumab treatment, median (95% CI) |                         |
|------------|----------------------------------------------------------------------|-------------------------|
|            | Medium dose ICS/LABA                                                 | High dose ICS/LABA      |
| Week 16    | -0.293 (-0.423, -0.163)                                              | -0.402 (-0.584, -0.220) |
| Week 52    | -0.314 (-0.445, -0.183)                                              | -0.371 (-0.553, -0.189) |

ACQ: asthma control questionnaire; CI: confidence interval.

**TABLE S2** Analyses of AQLQ scores with reslizumab by GINA Step 4 baseline therapy

| Assessment | Increase in AQLQ scores with reslizumab treatment, median (95% CI) |                      |
|------------|--------------------------------------------------------------------|----------------------|
|            | Medium dose ICS/LABA                                               | High dose ICS/LABA   |
| Week 16    | 0.279 (0.079, 0.479)                                               | 0.329 (0.080, 0.579) |
| Week 52    | 0.305 (0.134, 0.476)                                               | 0.406 (0.185, 0.628) |

AQLQ: asthma quality of life questionnaire; CI: confidence interval.
